# Supplementary material
Source: MDPI journal article supplement (https://www.mdpi.com/1999-4907/13/8/1307)
Supplement: s1 [file s1]

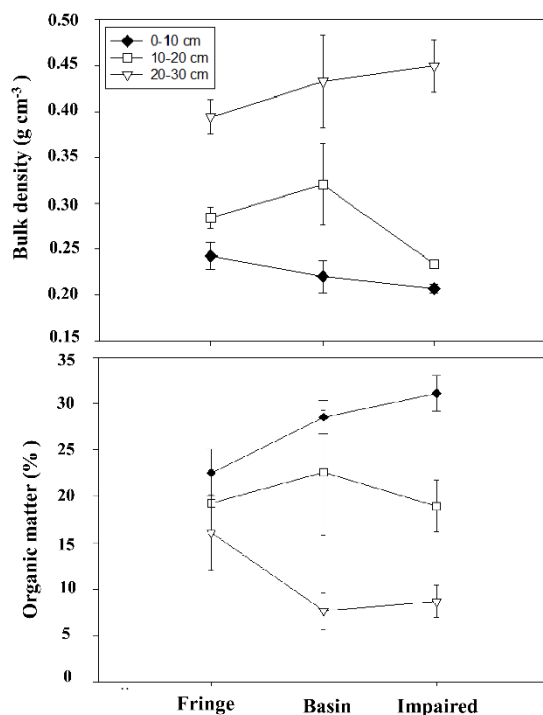

**Figure S1.** Soil bulk density and organic matter in three depths in the fringe, basin and impaired sites. Depth of soil depths are: 0-10 cm, diamonds; 10-20 cm; triangles, 20-30 cm. Vertical bars indicate one SE.

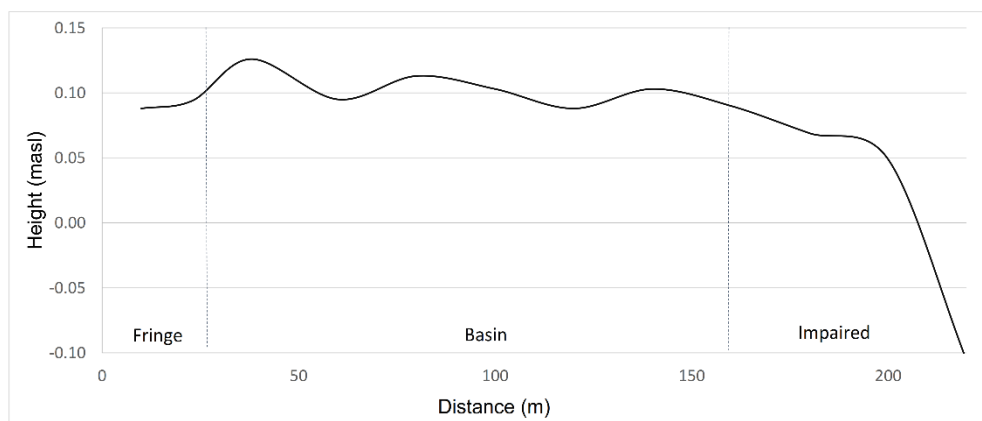

**Figure S2.** Topography along a 220 m-long transect from the fringe to the impaired site at Estero Pargo. The water level corresponds to the beginning of the maximum flooding season, in September 2016.
